CORRECTION

# Correction: Late Maastrichtian pterosaurs from North Africa and mass extinction of Pterosauria at the Cretaceous-Paleogene boundary

Nicholas R. Longrich, David M. Martill, Brian Andres

## Notice of republication

This article was republished on March 28 2018, to correct the following figure errors that were introduced during the final publication preparation stages:

Fig 1B contained a satellite image that was not available for publication under the Creative Commons Attribution License ([creativecommons.org/licenses/by/4.0/](https://creativecommons.org/licenses/by/4.0/)). Fig 1B has therefore been replaced with an image created by the author. The figure legend for Fig 1 has been updated to reflect this change.

Fig 6C, Fig 11C, Fig 11E and Fig 11F contained an incorrect scale bar. This has been corrected.

Fig 20 contained a typographical error which has been corrected.

Please download this article again to view the correct versions of the figures.

## Reference

1. Longrich NR, Martill DM, Andres B (2018) Late Maastrichtian pterosaurs from North Africa and mass extinction of Pterosauria at the Cretaceous-Paleogene boundary. PLOS Biology 16(3): e2001663. <https://doi.org/10.1371/journal.pbio.2001663> PMID: 29534059

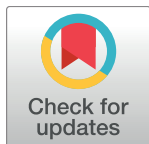

## OPEN ACCESS

**Citation:** Longrich NR, Martill DM, Andres B (2018) Correction: Late Maastrichtian pterosaurs from North Africa and mass extinction of Pterosauria at the Cretaceous-Paleogene boundary. PLoS Biol 16(4): e1002627. <https://doi.org/10.1371/journal.pbio.1002627>

**Published:** April 11, 2018

**Copyright:** © 2018 Longrich et al. This is an open access article distributed under the terms of the [Creative Commons Attribution License](https://creativecommons.org/licenses/by/4.0/), which permits unrestricted use, distribution, and reproduction in any medium, provided the original author and source are credited.
